# Supplementary material for: Cerebellar pathology contributes to neurodevelopmental deficits in spinal muscular atrophy
Source: Research Square preprint supplement (doi:10.21203/rs.3.rs-6819992/v1), 2025-06-11
Supplement: Supplementary file 1 [file 2f9a066abca179c50c38ab2c.docx]

**Supplementary Data**

**Supplementary Figures**

**Figure S1: Mouse models for milder SMA, ALS and SMARD1 lack cerebellar pathology.**


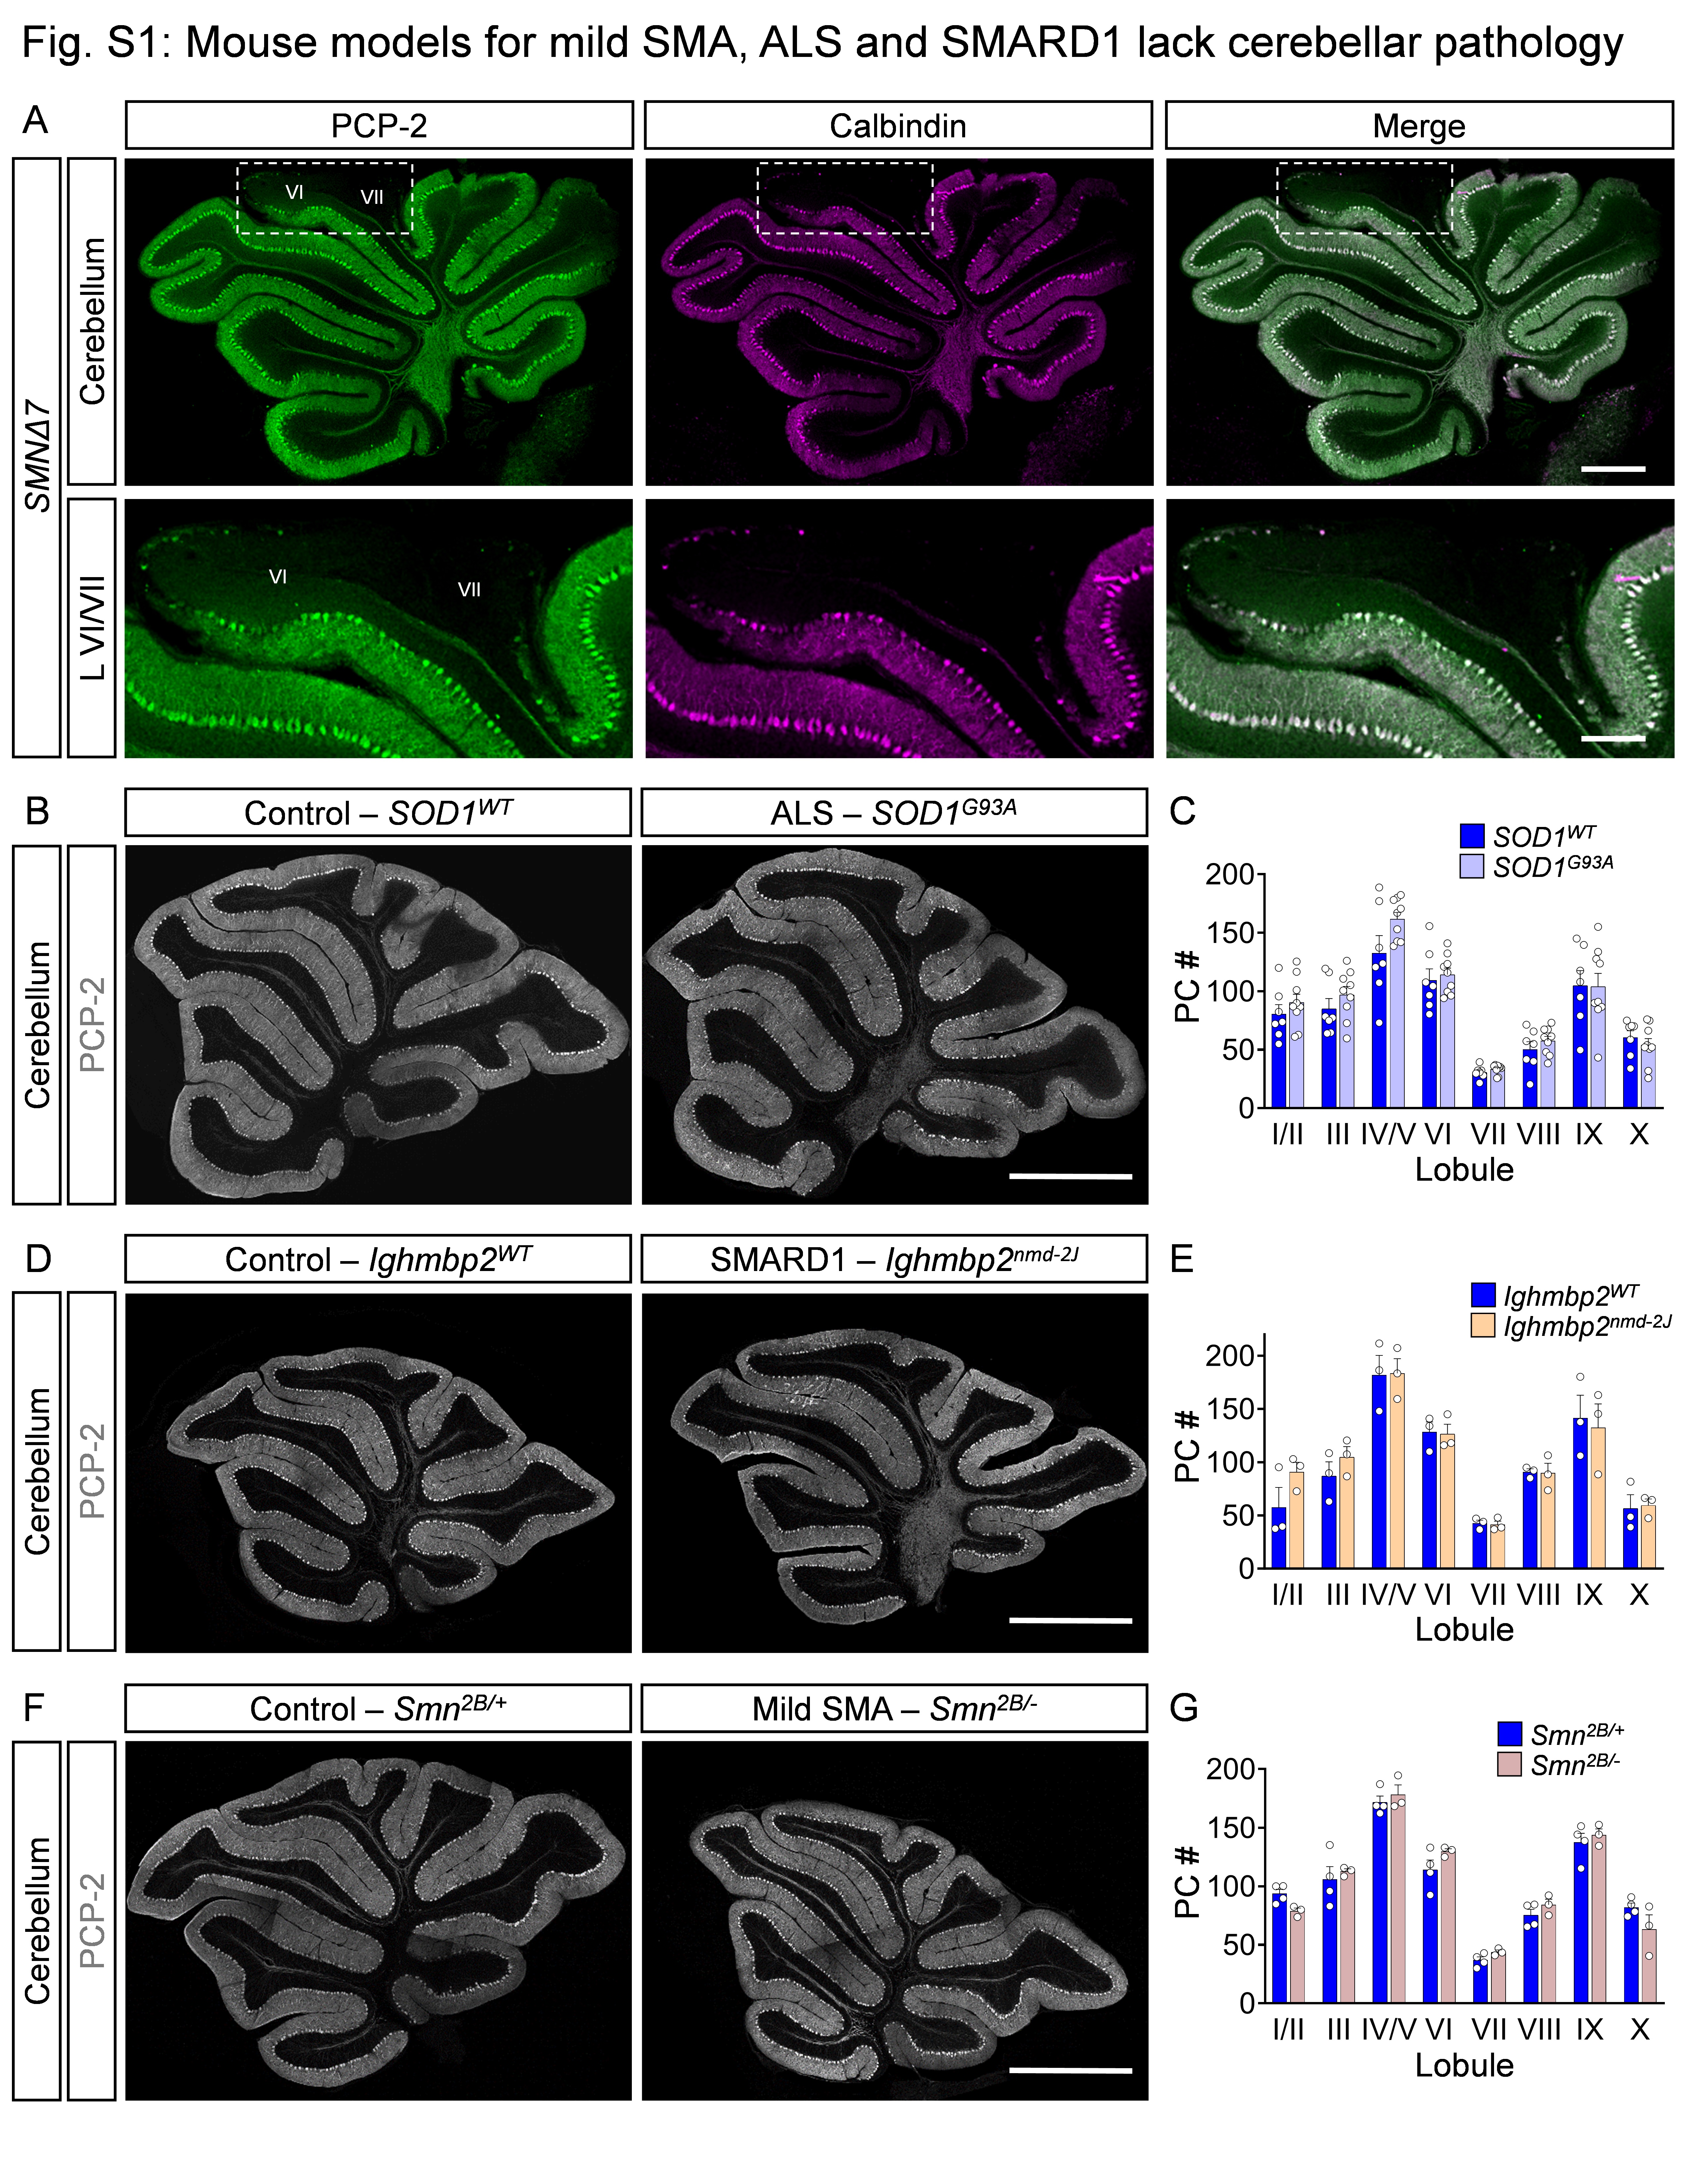


(**A**) Immunostaining of PCP-2 (green) and calbindin (magenta) in the cerebellum (upper panel) and lobule VI/VII (lower panel) of *SMNΔ7* mice at P10 (scale bar for upper panel = 500 μm and lower panel = 200 μm). (**B**) PCP-2 staining (grey) and (**C**) quantification of PCs per lobule from *SOD1WT* control (N = 7) and *SOD1G93A* ALS (N = 9) mice at P130 (scale bar = 1 mm). (**D**) PCP-2 staining (grey) and (**E**) quantification of PCs per lobule from the cerebellum of *Ighmbp2WT* control (N = 3) and *Ighmbp2nmd-2J**SMARD1* (N = 3) mice at P52. (**F**) PCP-2 staining and (**G**) quantification of PCs (grey) per lobule from the cerebellum of *Smn2B/+* control (N = 4) and *Smn2B/-*(N = 3) mice at P23. Statistical analysis was performed using multiple t-tests.

**Figure S2: SMA PCs are hyperactive at P5.**

**
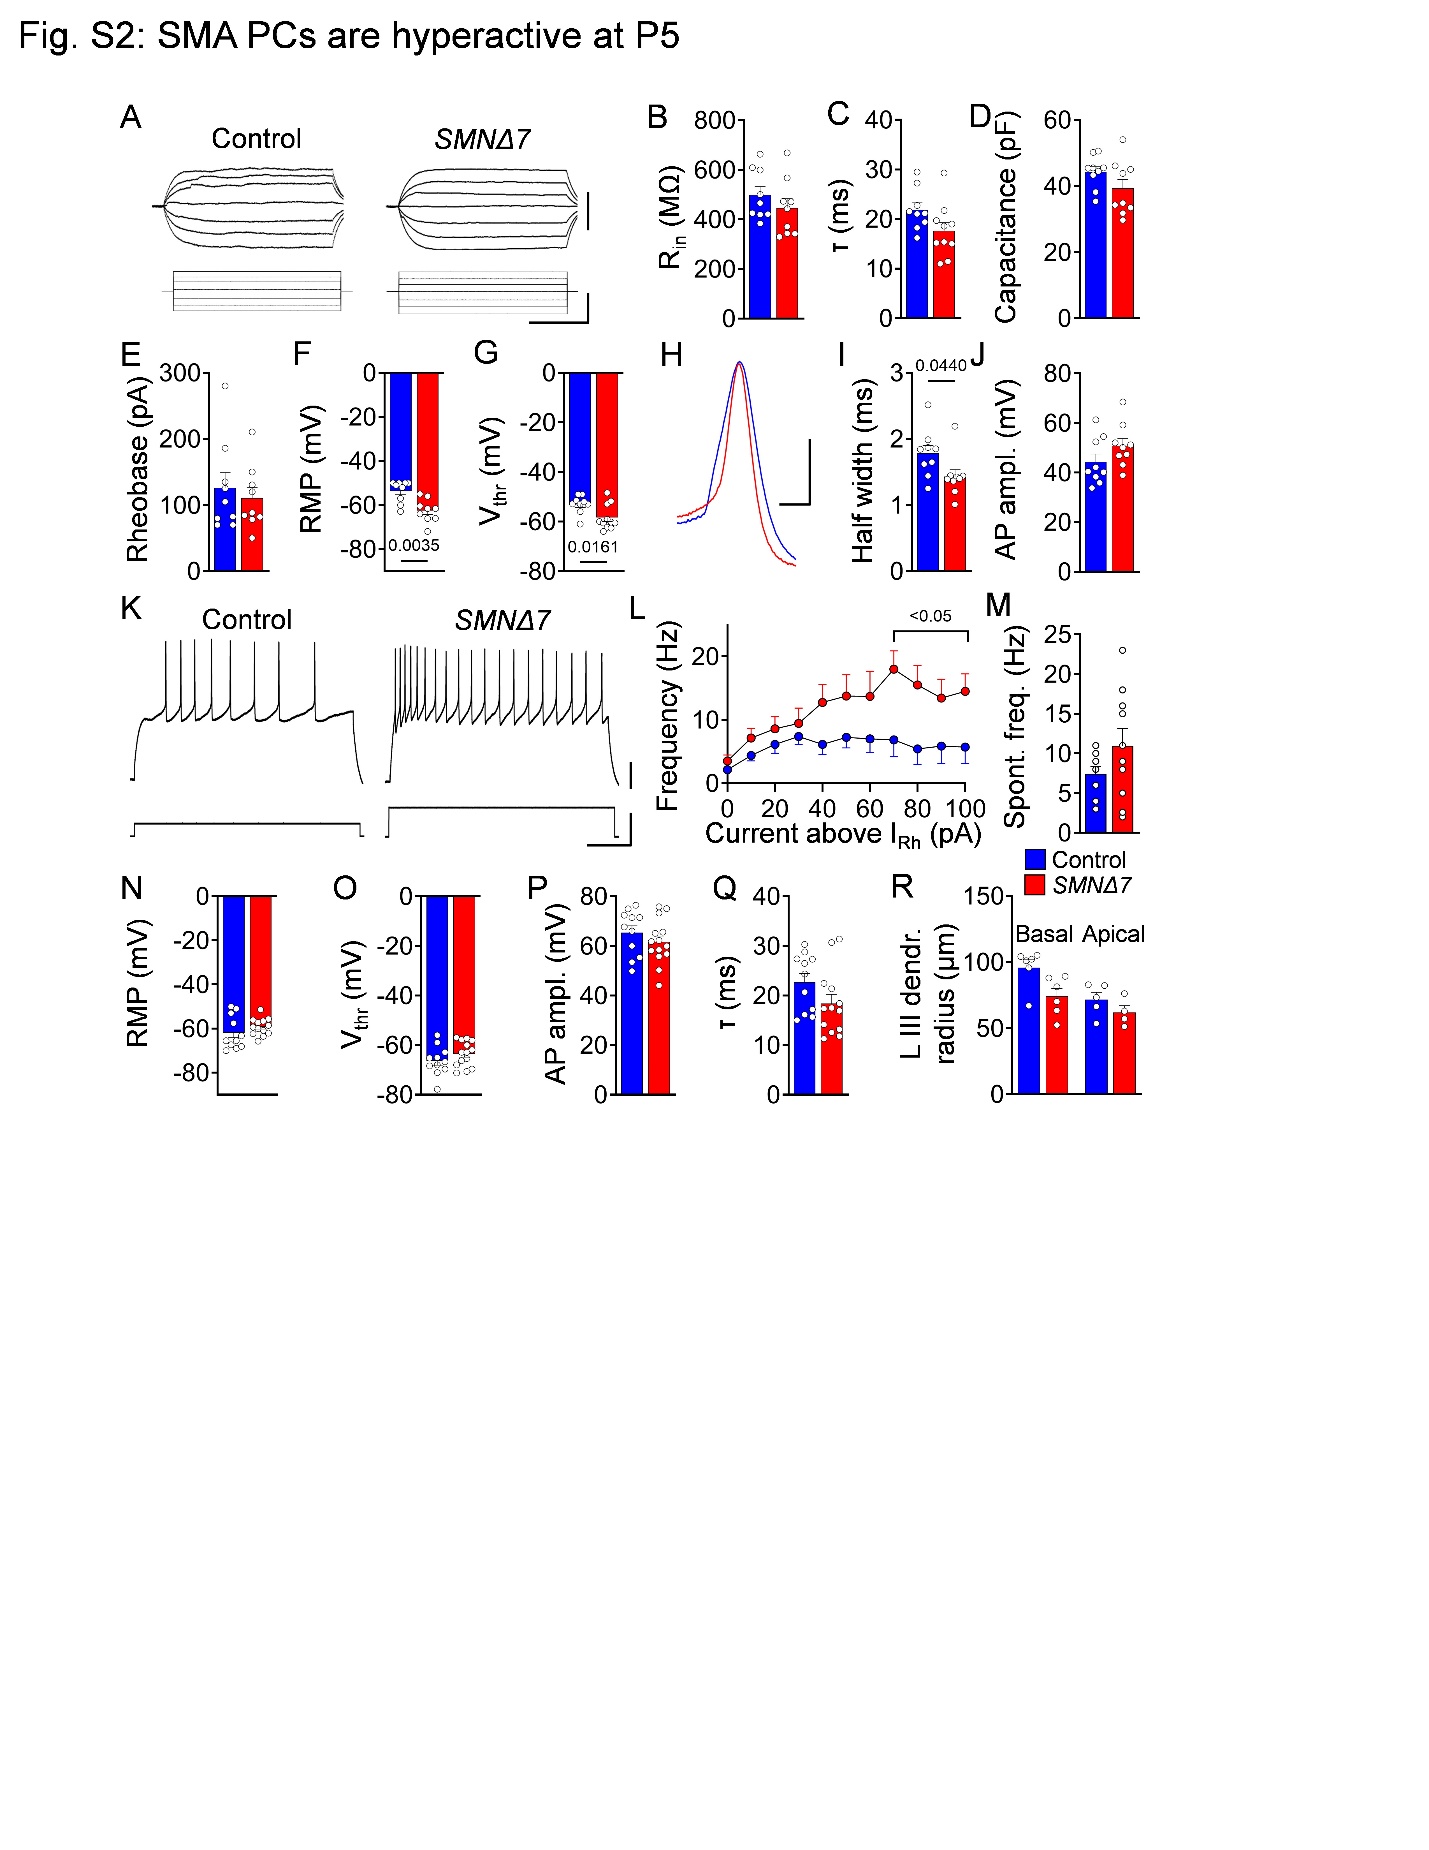
**

(**A**) Representative voltage responses to current injections in lobules VI/VII PCs from control and *SMNΔ7* mice at P5 (scale bars: 10 mV, 40 pA, 100 ms). Quantification of **(B)** input resistance (Rin), **(C)** membrane time constant (τ), **(D)** capacitance, **(E)** rheobase, **(F)** resting membrane potential (RMP), and **(G)** action potential (AP) threshold (Vthr) in control (n = 9) and SMNΔ7 (n = 10) PCs from at least N = 4 mice per genotype at P5. **(H)** Representative AP traces and quantification of **(I)** AP half-width and **(J)** amplitude (scale bars: 20 mV, 2 ms). **(K)** Representative traces of AP firing in response to current injection (scale bars: 20 mV, 200 pA, 200 ms), and **(L)** quantification of firing frequency as a function of current injection above rheobase. **(M)** Quantification of spontaneous firing frequency in control and *SMNΔ7* PCs at P5. Quantification of **(N)** RMP, **(O)** AP Vthr, **(P)** AP amplitude, and **(Q)** τ in lobules VI/VII PCs from control (n = 13) and *SMNΔ7* (n = 14) mice at P10 (at least N = 4 mice per genotype). **(R)** Dendritic tree radius quantification for basal and apical PCs in lobule III from control (N = 3) and *SMNΔ7* (N = 4) mice at P10. Statistical significance determined by unpaired t-test (B–G, I, J, M–Q) or one-way ANOVA (R).

**Figure S3: Differential expression of VGLUT1/2 onto and VGAT synapses derived from PCs**

**
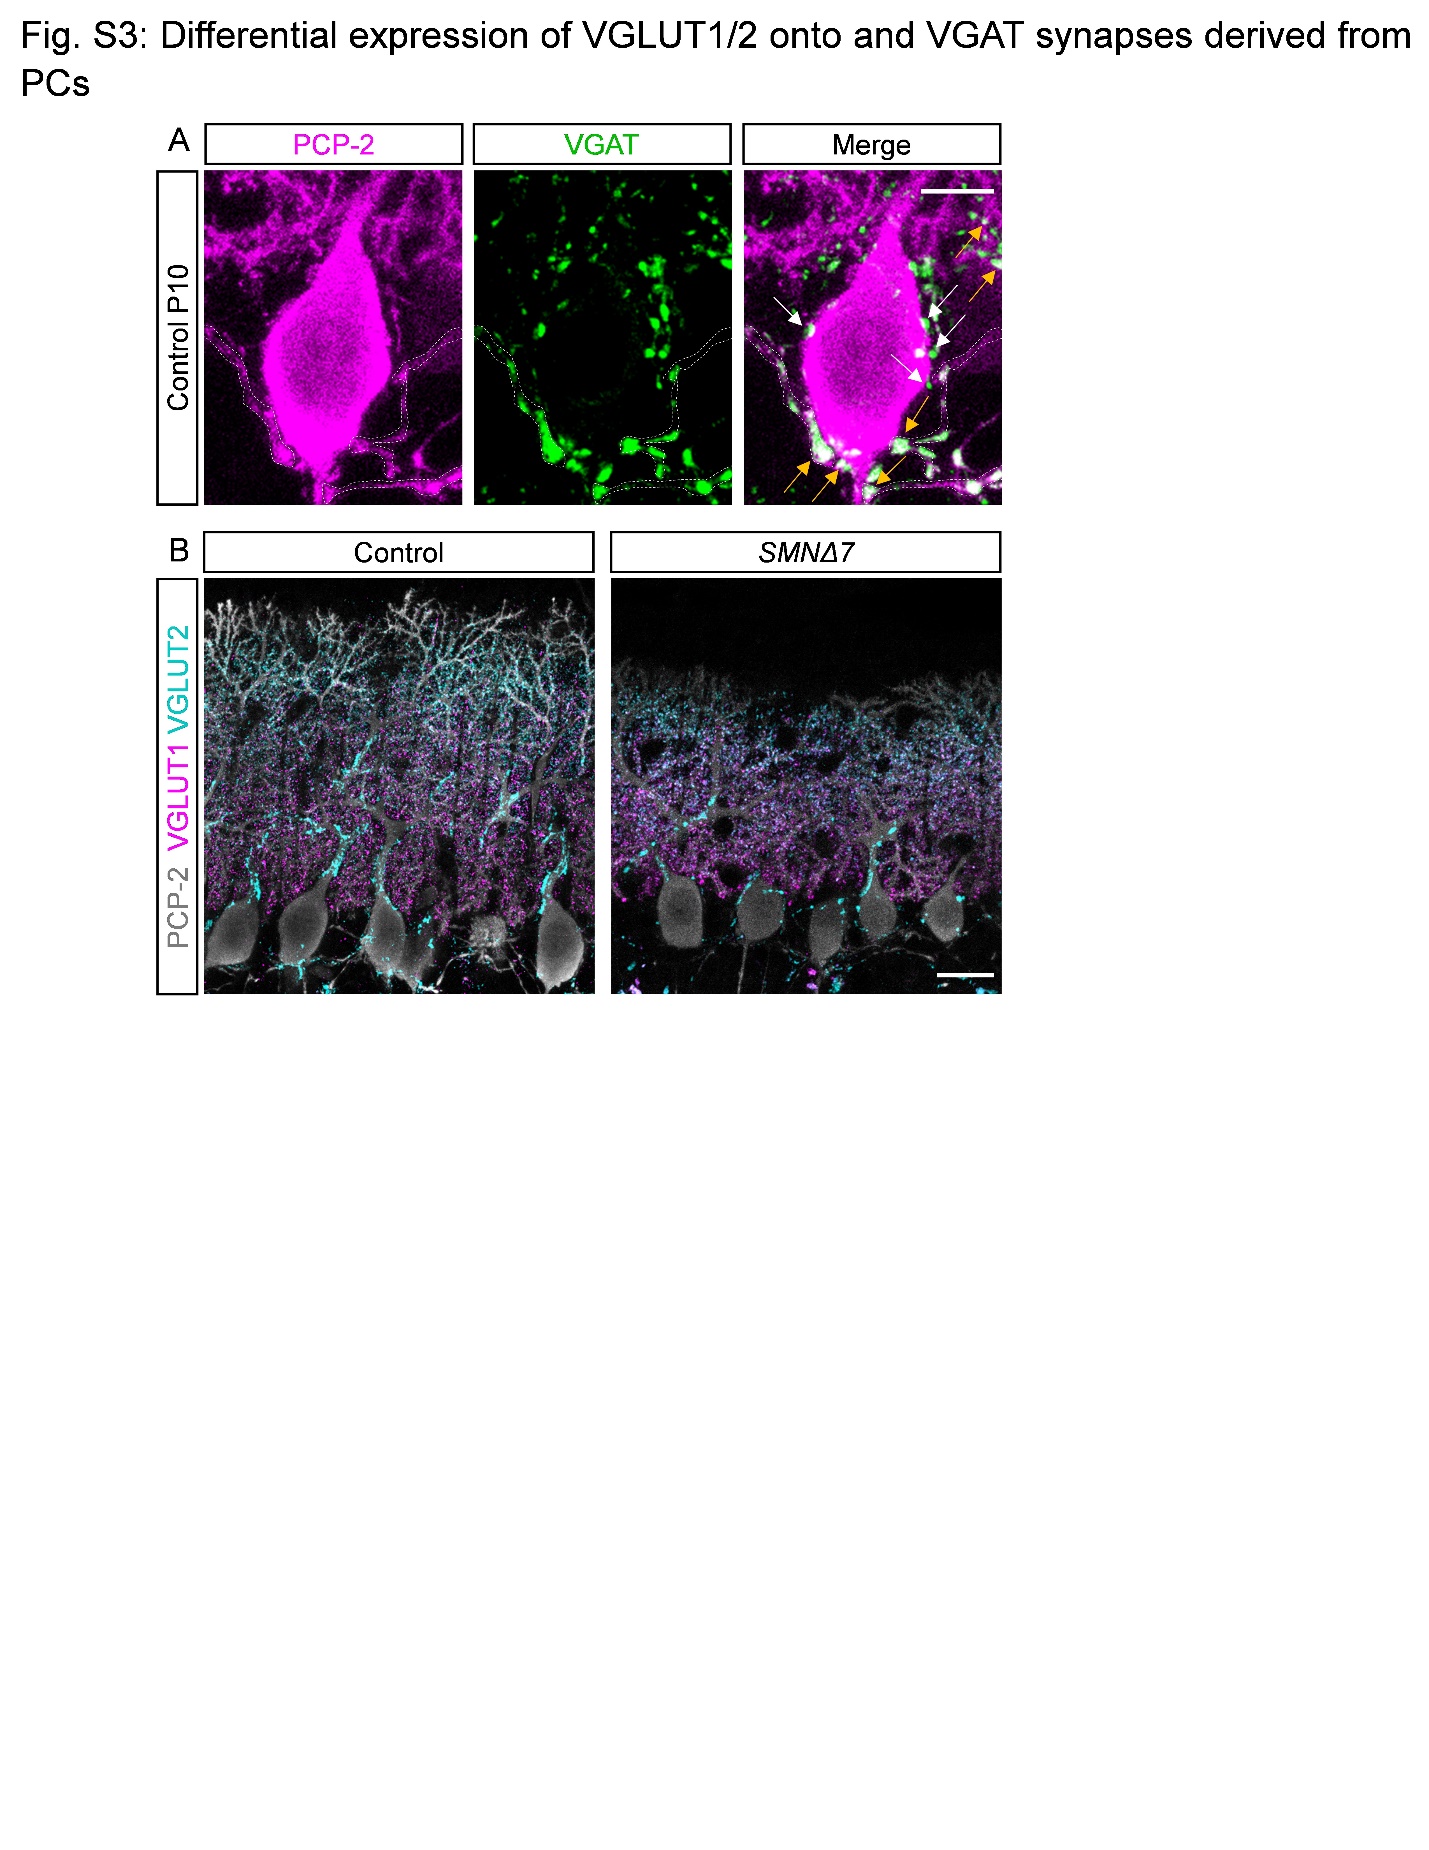
**

**(A)** Immunostaining of PCP-2 (magenta) and VGAT (green) to visualize PCs and inhibitory synapses from neighboring PCs (dotted outlines, yellow arrows) or other sources (white arrows) (scale bar = 10 μm) of a WT mice at P10. (**B**) Immunostaining of PCP-2 (grey) and VGLUT1 (magenta) and VGLUT2 (cyan) to label glutamatergic synapses onto PCs of a WT mouse at P10 (scale bar = 20 μm).

**Figure S4: No synaptic dysfunction in resistant lobules of SMA mice**

**
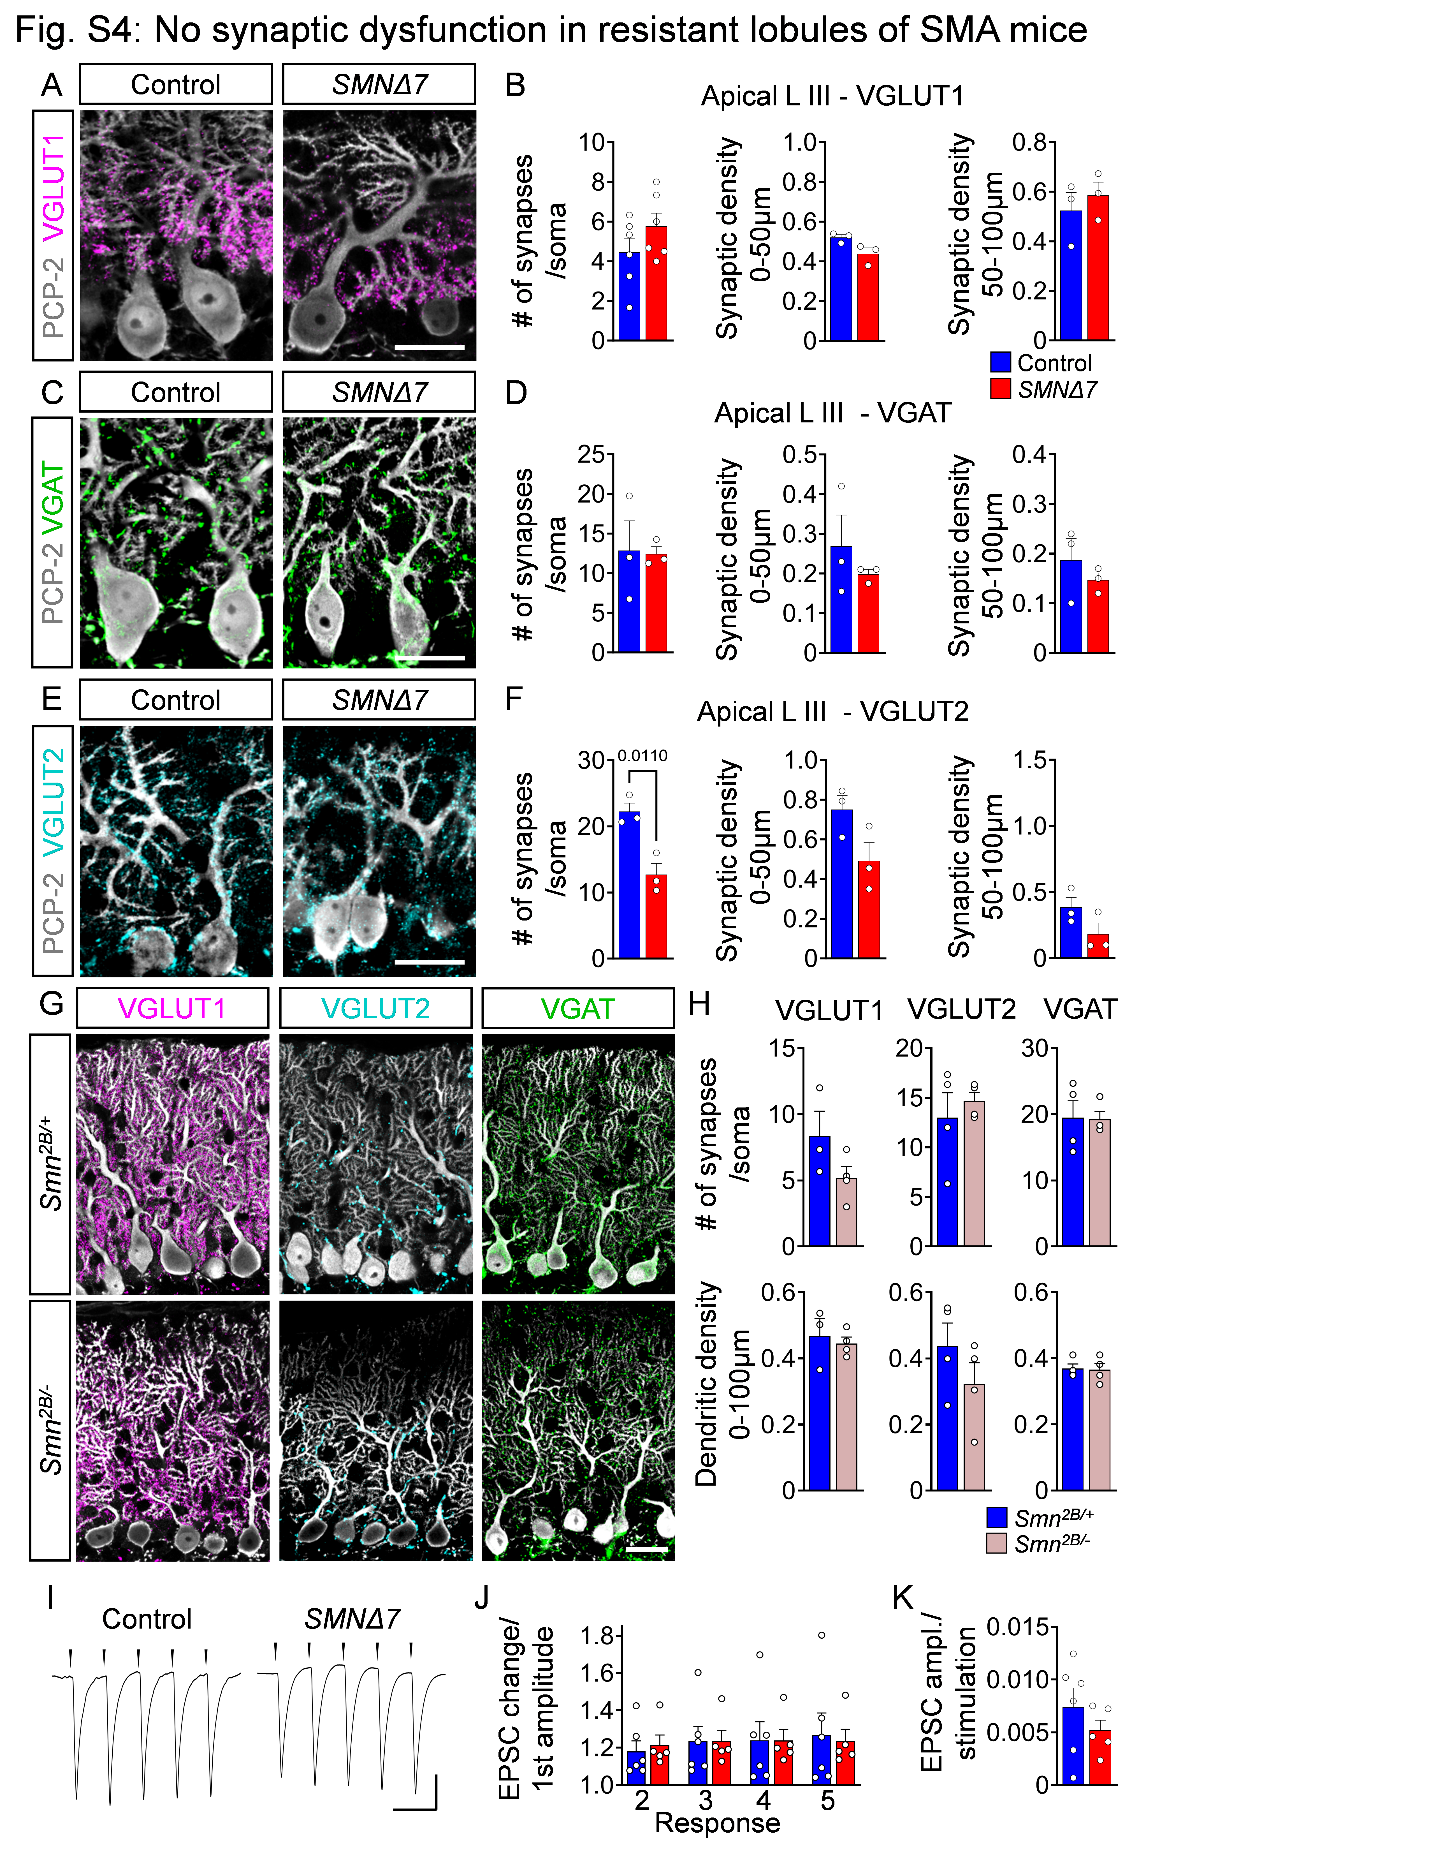
**

(**A**) Immunostaining of PCP-2 (grey) and VGLUT1 (magenta) in control and *SMNΔ7* apical PCs of lobule III at P10 (scale bar = 20 mm). (**B**) Quantification of VGLUT1 synapses on soma, proximal (0–50 μm), and distal (50–100 μm) dendrites of apical PCs in lobule III from control (N = 3–5) and SMNΔ7 (N = 3–4) mice at P10. (**C**) Immunostaining of PCP-2 (grey) and VGAT (green) of control and *SMNΔ7* apical PCs in lobule III at P10 (scale bar = 20 μm). (**D**) Quantification of VGAT synapses on soma, proximal (0–50 μm), and distal (50–100 μm) dendrites of apical PCs in lobule III from control (N = 3–6) and *SMNΔ7* (N = 3–5) mice. (**E**) Immunostaining of PCP-2 (grey) and VGLUT2 (cyan) in control and *SMNΔ7* apical PCs from lobule III at P10 (scale bar = 20 μm). (**F**) Quantification of VGLUT2 synapses on soma, proximal (0–50 μm), and distal (50–100 μm) dendrites of apical PCs in lobule III from control (N = 3–6) and *SMNΔ7* (N = 3–5) mice. (**G**) Immunostaining of PCP-2 (grey), VGLUT1 (magenta, left panel), VGLUT2 (cyan, middle panel), and VGAT (green, right panel) in PCs of lobules VI/VII from *Smn2B/+*and *Smn2B/–*mice at P23 (scale bar = 25 μm). (**H**) Quantification of VGLUT1+ (left panel), VGLUT2+ (middle panel), and VGAT+ (right panel) synapses on the soma (upper panel) and the dendrites up to 100 μm (lower panel) in PCs from *Smn2B/+*(N = 3–4) and *Smn2B/–*(N = 3–4) mice at P23. (**I**) Representative traces of EPSCs in control and *SMNΔ7* PCs from lobule III following 200 Hz parallel fiber stimulation at P10 (scale bar: 100 pA and 5 ms). (**J**) Quantification of EPSC amplitude changes of the second, third, fourth, and fifth response normalized to the first response in control (n = 6) and *SMNΔ7* (n = 5) PCs from lobule III of at least N = 3 mice per genotype at P10. (**K**) Ratio of EPSC amplitude/stimulation from control (n = 6) and *SMNΔ7* (n = 5) PCs in lobule III and stimulation intensity for parallel fibers. Statistical analysis was performed using unpaired t-test (**B, D, F, H, K**) and two-way ANOVA (**J**).

**Figure S5: Functional input and output from GCs are unaltered in SMA mice.**


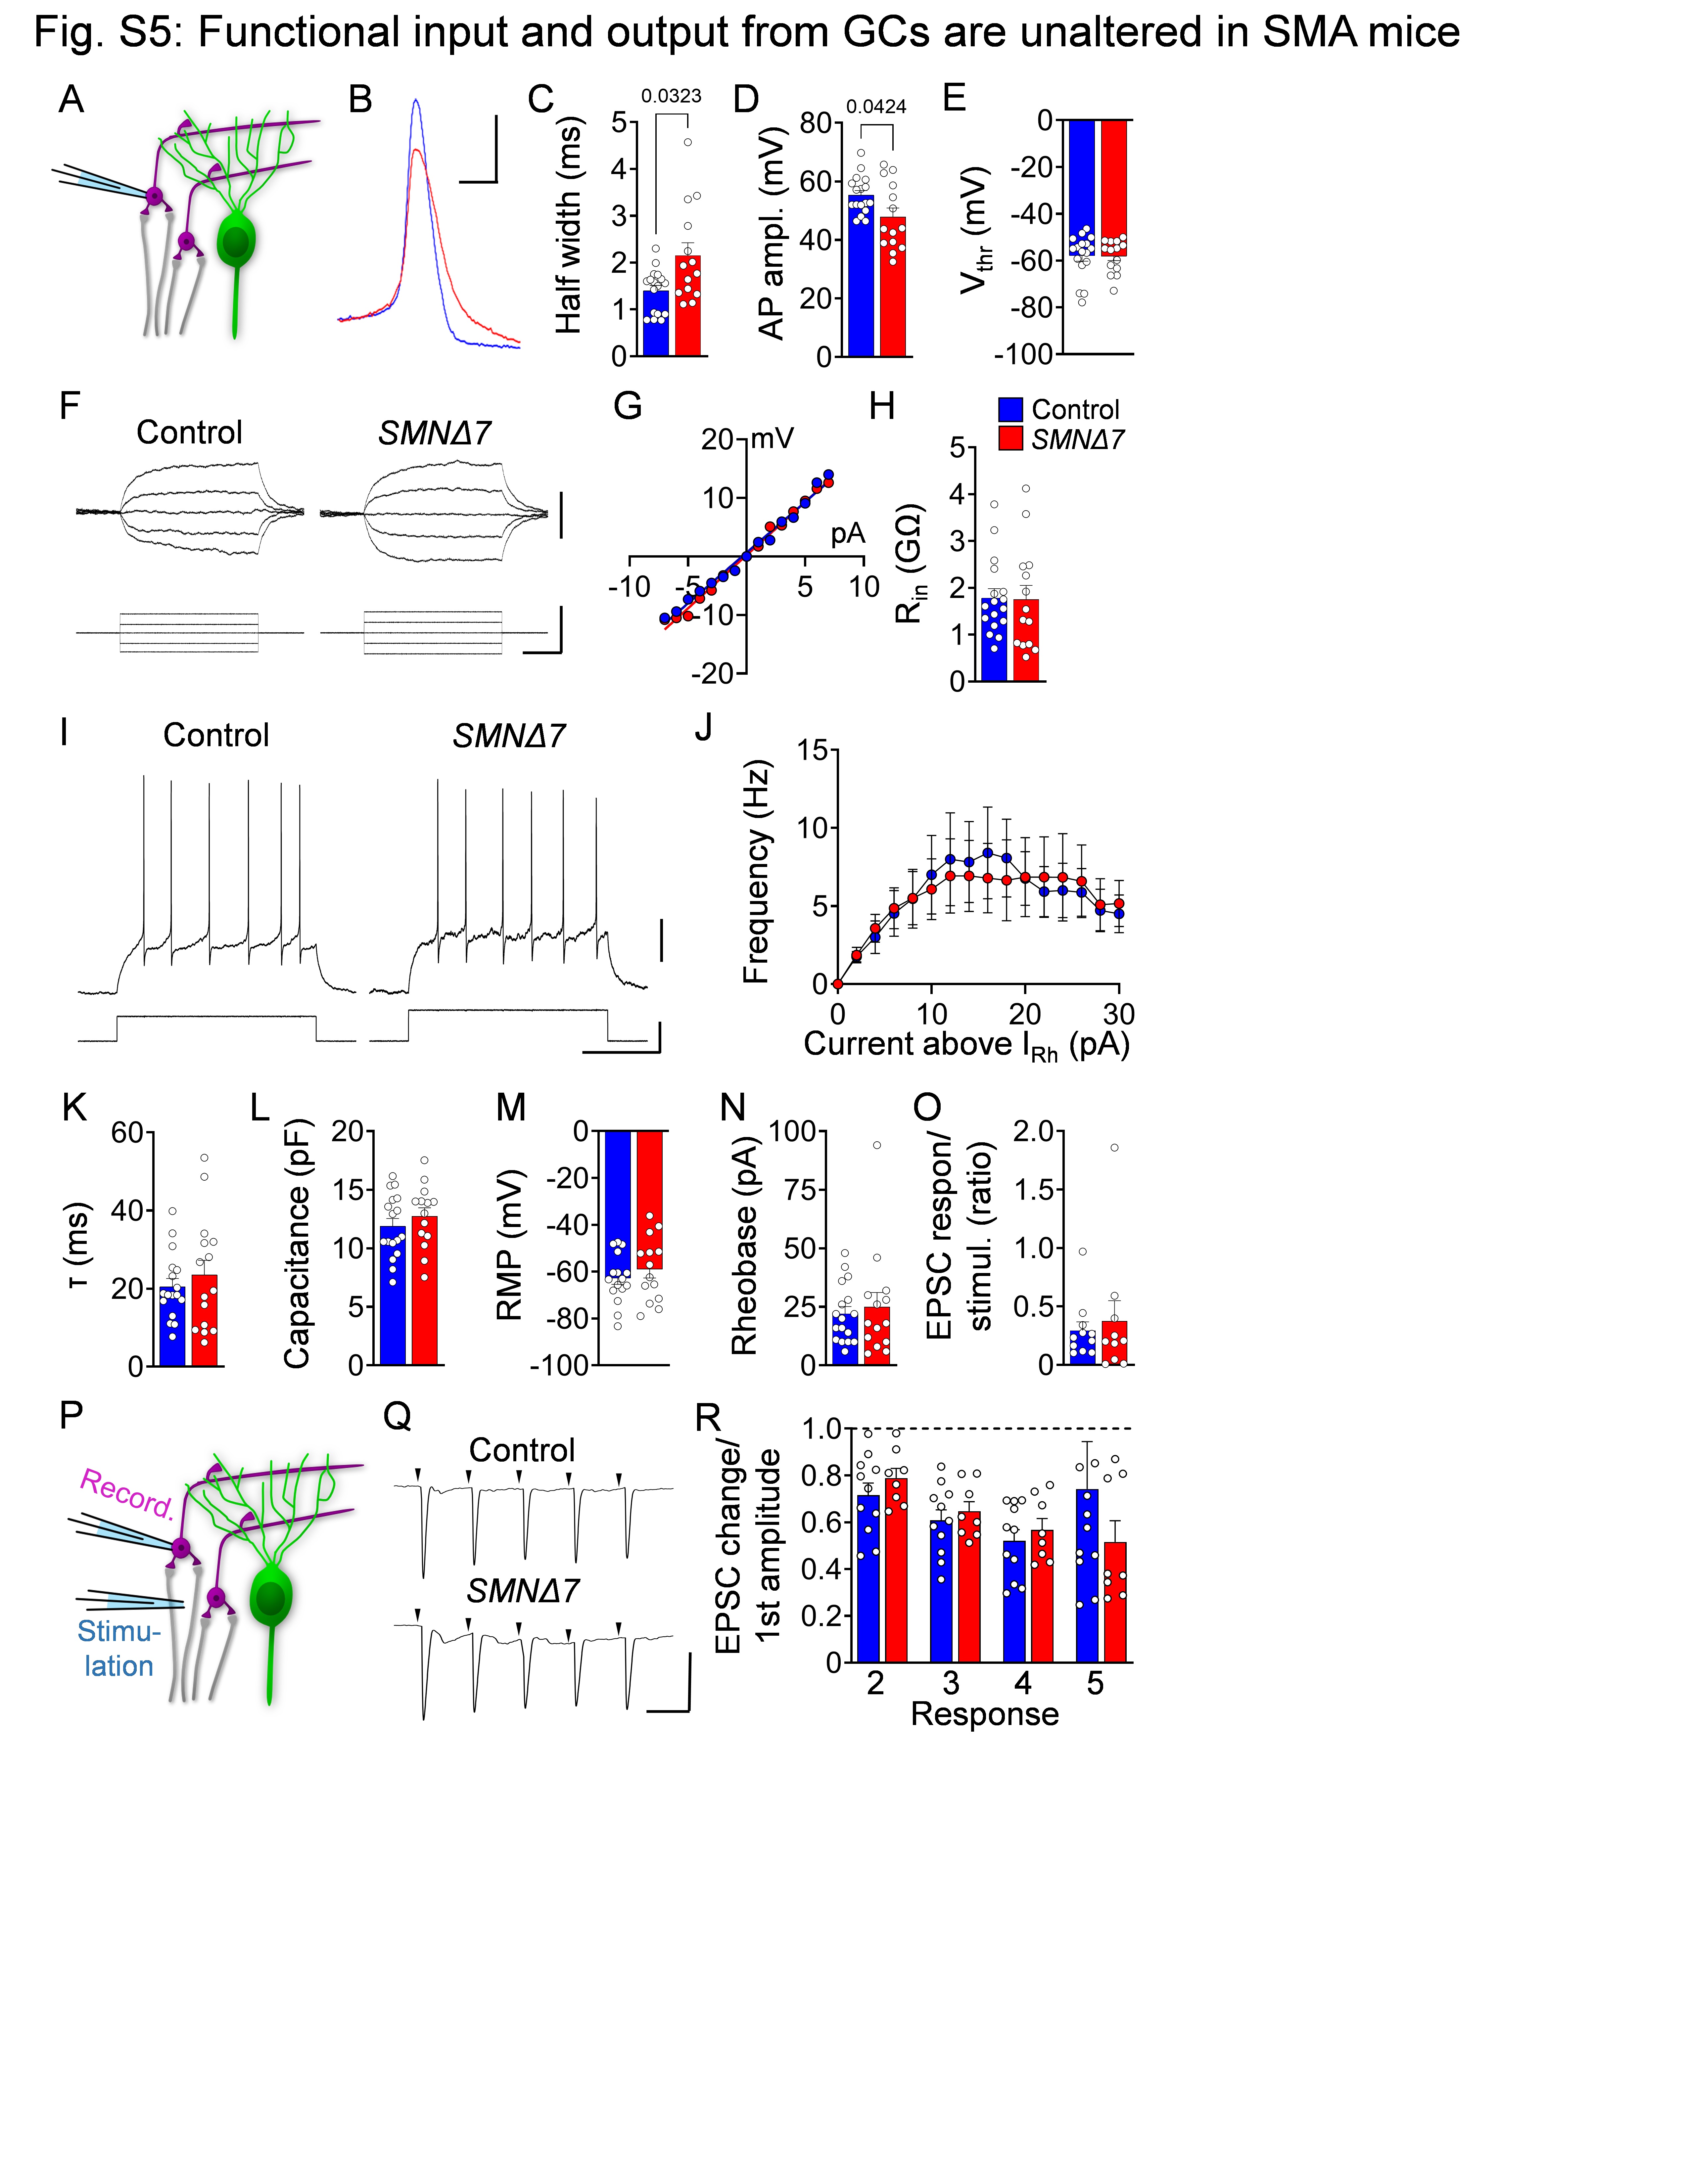


(**A**) Schematic of the whole-cell patch-clamp approach for analysis of GCs. (**B**) Representative traces of AP and quantification of (**C**) half width, (**D**) AP amplitude and (**E**) Vthr in control (n = 17) and SMNΔ7 (n = 14) GCs of lobules VI/VII from at least N = 4 mice per genotype at P10 (scale bars = 20 mV, 10 mV and 1 ms). (**F**) Membrane responses following current injections in control and SMNΔ7 GCs of lobules VI/VII at P10 (scale bars = 30 mV, 100 pA and 10 ms). (**G**) Current to voltage plot in control and SMNΔ7 GCs at P10. (**H**) Quantification of Rin in control (n = 17) and SMNΔ7 (n = 14) GCs at P10. (**I**) Representative traces of firing rates in control and SMNΔ7 GCs from lobule VI/VII following current injection at P10 (scale bars = 20 mV, 10 pA and 200 ms). (**J**) Firing frequency depending on the current injection above rheobase in control (n = 17) and SMNΔ7 (n = 14) GCs from at least N = 4 mice per genotype at P10. Quantification of (**K**) τ, (**L**) capacitance, (**M**) RMP and (**N**) rheobase in control (n = 17) and SMNΔ7 (n = 14) GCs from lobules VI/VII. (**O**) Ratio of EPSC amplitude/stimulation of control (n = 11) and SMNΔ7 (n = 8) GCs in lobules VI/VII. (**P**) Schematic of the approach for EPSC measurements of GCs following mossy fiber stimulation. (**Q**) Representative traces from control and SMNΔ7 GCs in lobules VI/VII following 100 Hz mossy fiber stimulation at P10 (scale bar = 200 pA and 10 ms). (**R**) Quantification of EPSC amplitude changes of the second, third, fourth and fifth response normalized to the first response in control (n = 11) and SMNΔ7 (n = 8) GCs from lobules VI/VII following mossy fiber stimulation at P10. Statistical analysis was performed using unpaired t-test (**C–E, H, K–O**) and two-way ANOVA (**R**).

**Figure S6: PV-Cre promoter remains inactive in lobules VI/VII until the second postnatal week.**

**
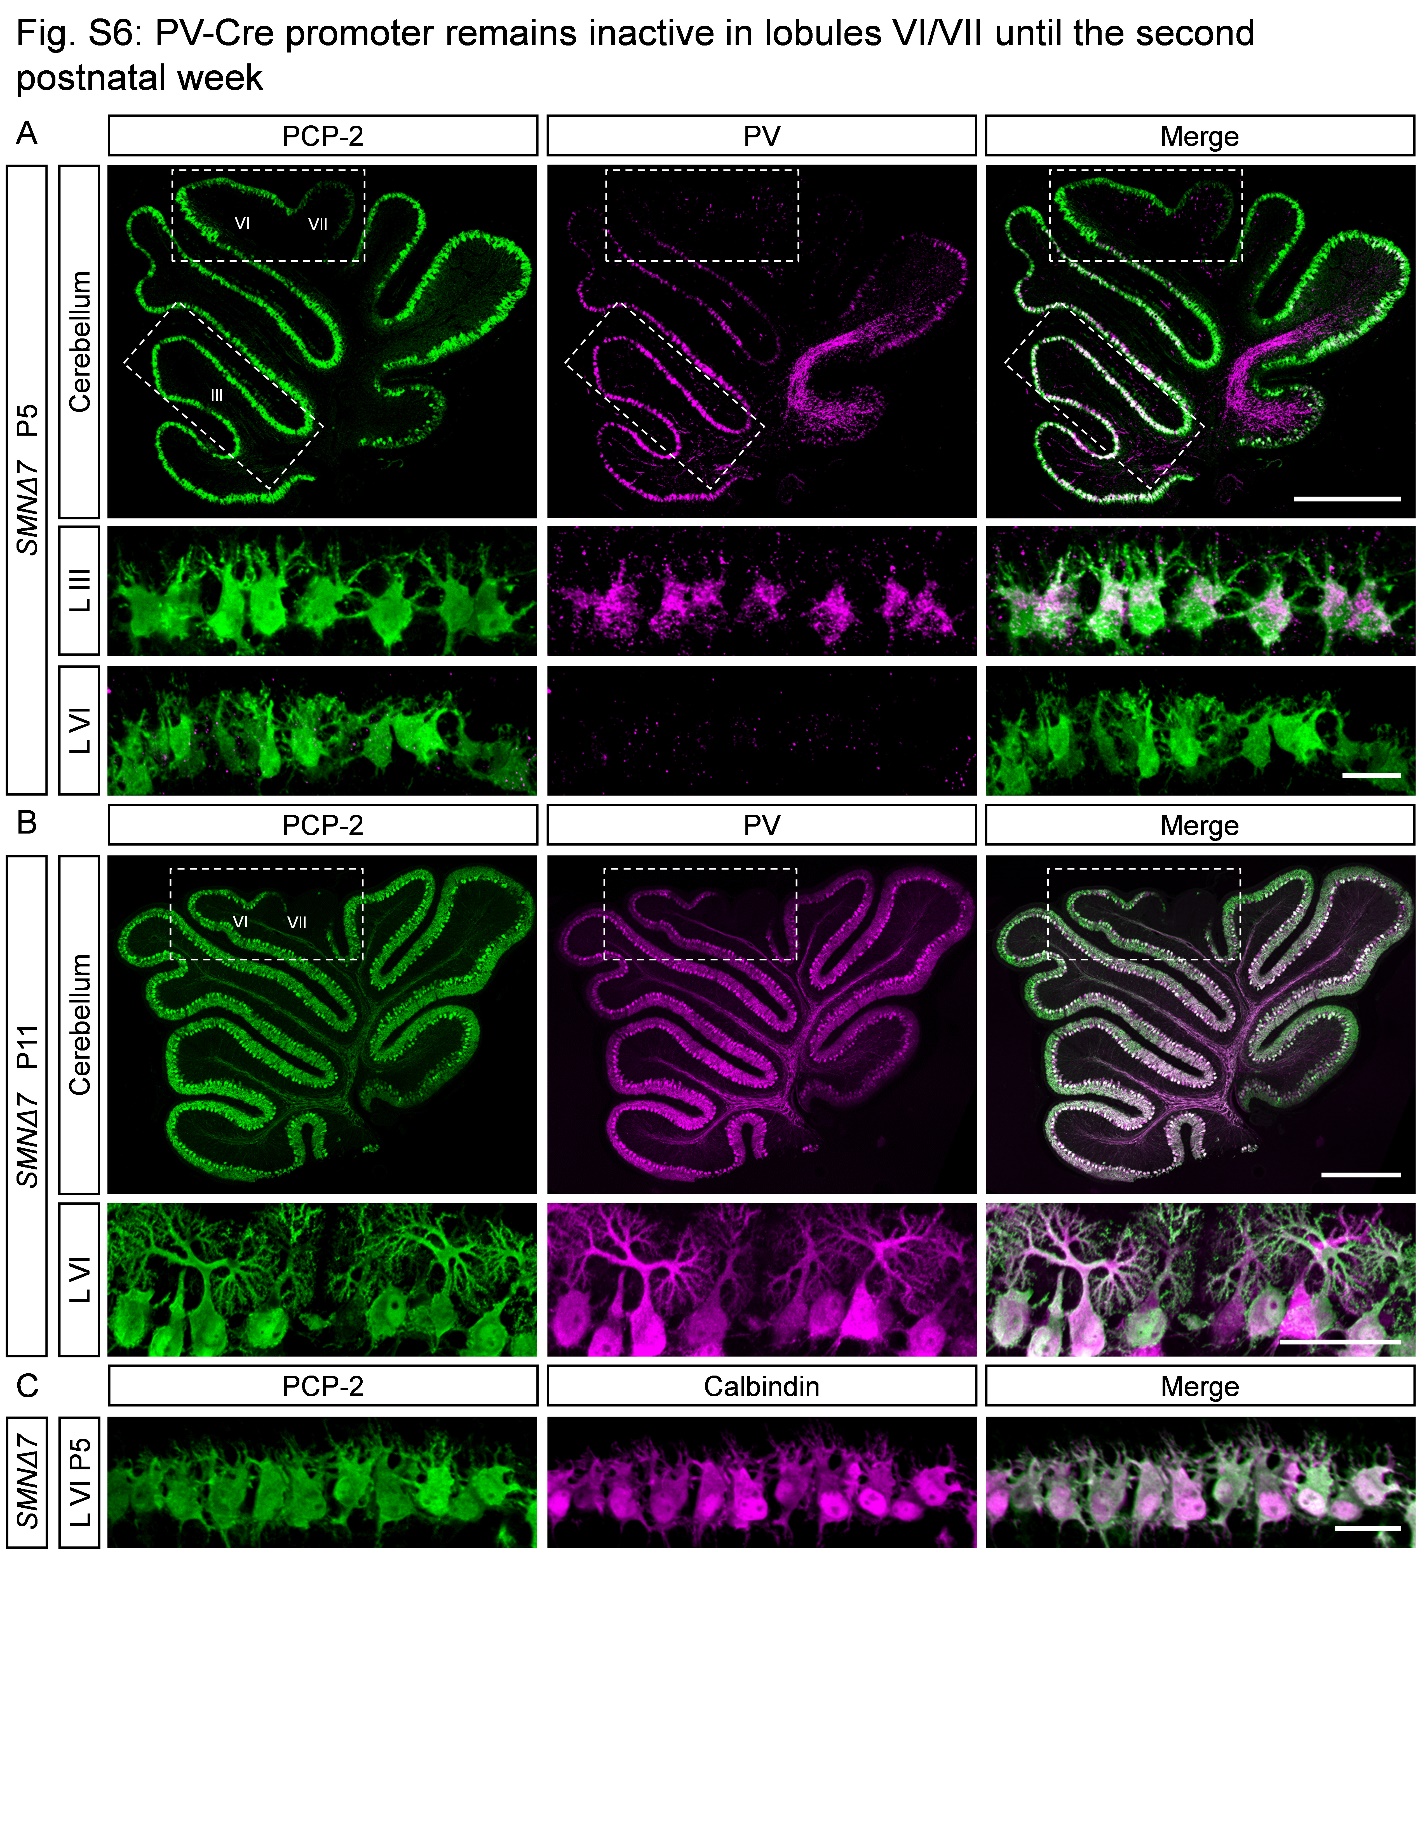
**

Immunostaining of PCP-2 (green) and parvalbumin (magenta) in the cerebellum, lobule III and lobules VI/VII from SMNΔ7 mice at (**A**) P5 and (**B**) P11 (scale bar: upper panel = 500 μm, lower panel = 20 μm for A, upper panel = 500 μm, lower panel = 50 μm for B). (**C**) Immunostaining of PCP-2 (green) and calbindin (magenta) in lobules VI/VII from SMNΔ7 mice at P5 (scale bar = 20 μm).

**Figure S7: p53 pathway activation is reduced in resistant lobules.**

**
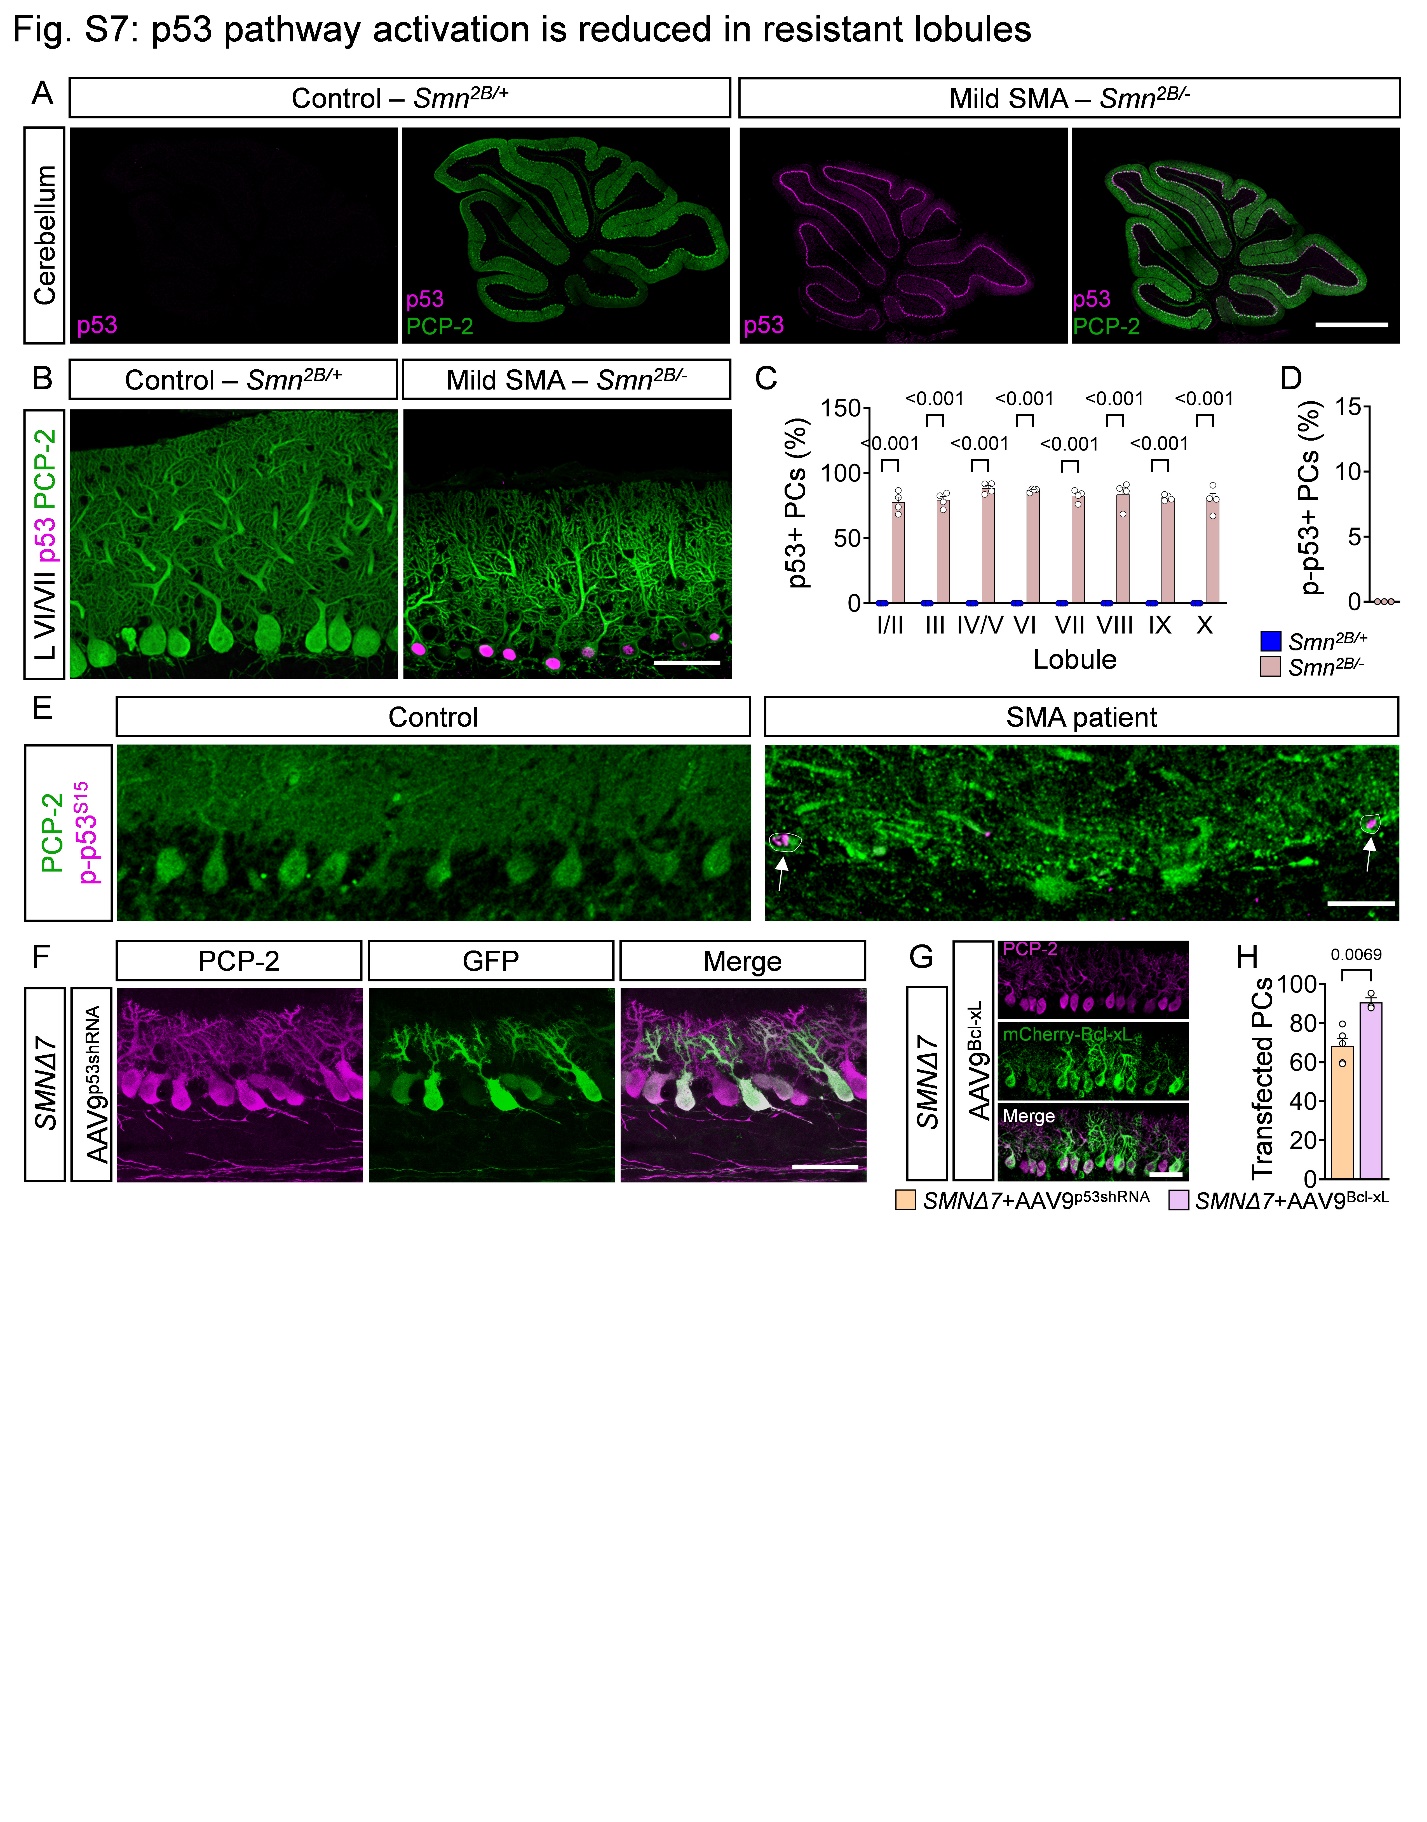
**

Immunostaining of p53 (magenta) and PCP-2 (green) in (**A**) cerebellar sections and (**B**) lobules VI/VII from *Smn2B*/+ control and *Smn2B*/- mice at P23 (scale bar: cerebellum = 1 mm, lobules VI/VII = 50 μm). (**C**) Quantification of p53+ PCs in %in different lobules and (**D**) p-p53S18+ PCs in % from *Smn2B*/+ control (N = 4) and *Smn2B*/- SMA (N = 4) mice at P23. (**E**) Immunostaining of p-p53S15 (magenta) and PCP-2 (green) in the human vermis from control and SMA Type I autopsy tissue (circles and arrows indicate p-p53S15+ degenerating PCs (scale bar = 50 μm). (**F**) Immunostaining of PCP-2 (magenta) and GFP (green) in lobules VI/VII from *SMNΔ7*+AAV9-p53shRNA mice at P10 (scale bar = 50 μm). (**G**) Immunostaining of PCP-2 (magenta) and mCherry-Bcl-xL (green) in lobules VI/VII from *SMNΔ7* mice injected with AAV9-Bcl-xL-mcherry (scale bar = 50 μm). (**H**) Percentage of transfected PCs from *SMNΔ7* mice treated with AAV9-p53shRNA (N = 5) and AAV9-Bcl-xL-mcherry (N = 3) at P10. Statistical analysis was performed using two-way ANOVA (**C**) and unpaired t-test (**H**).

**Figure S8: Selective viral SMN restoration in PCs.**


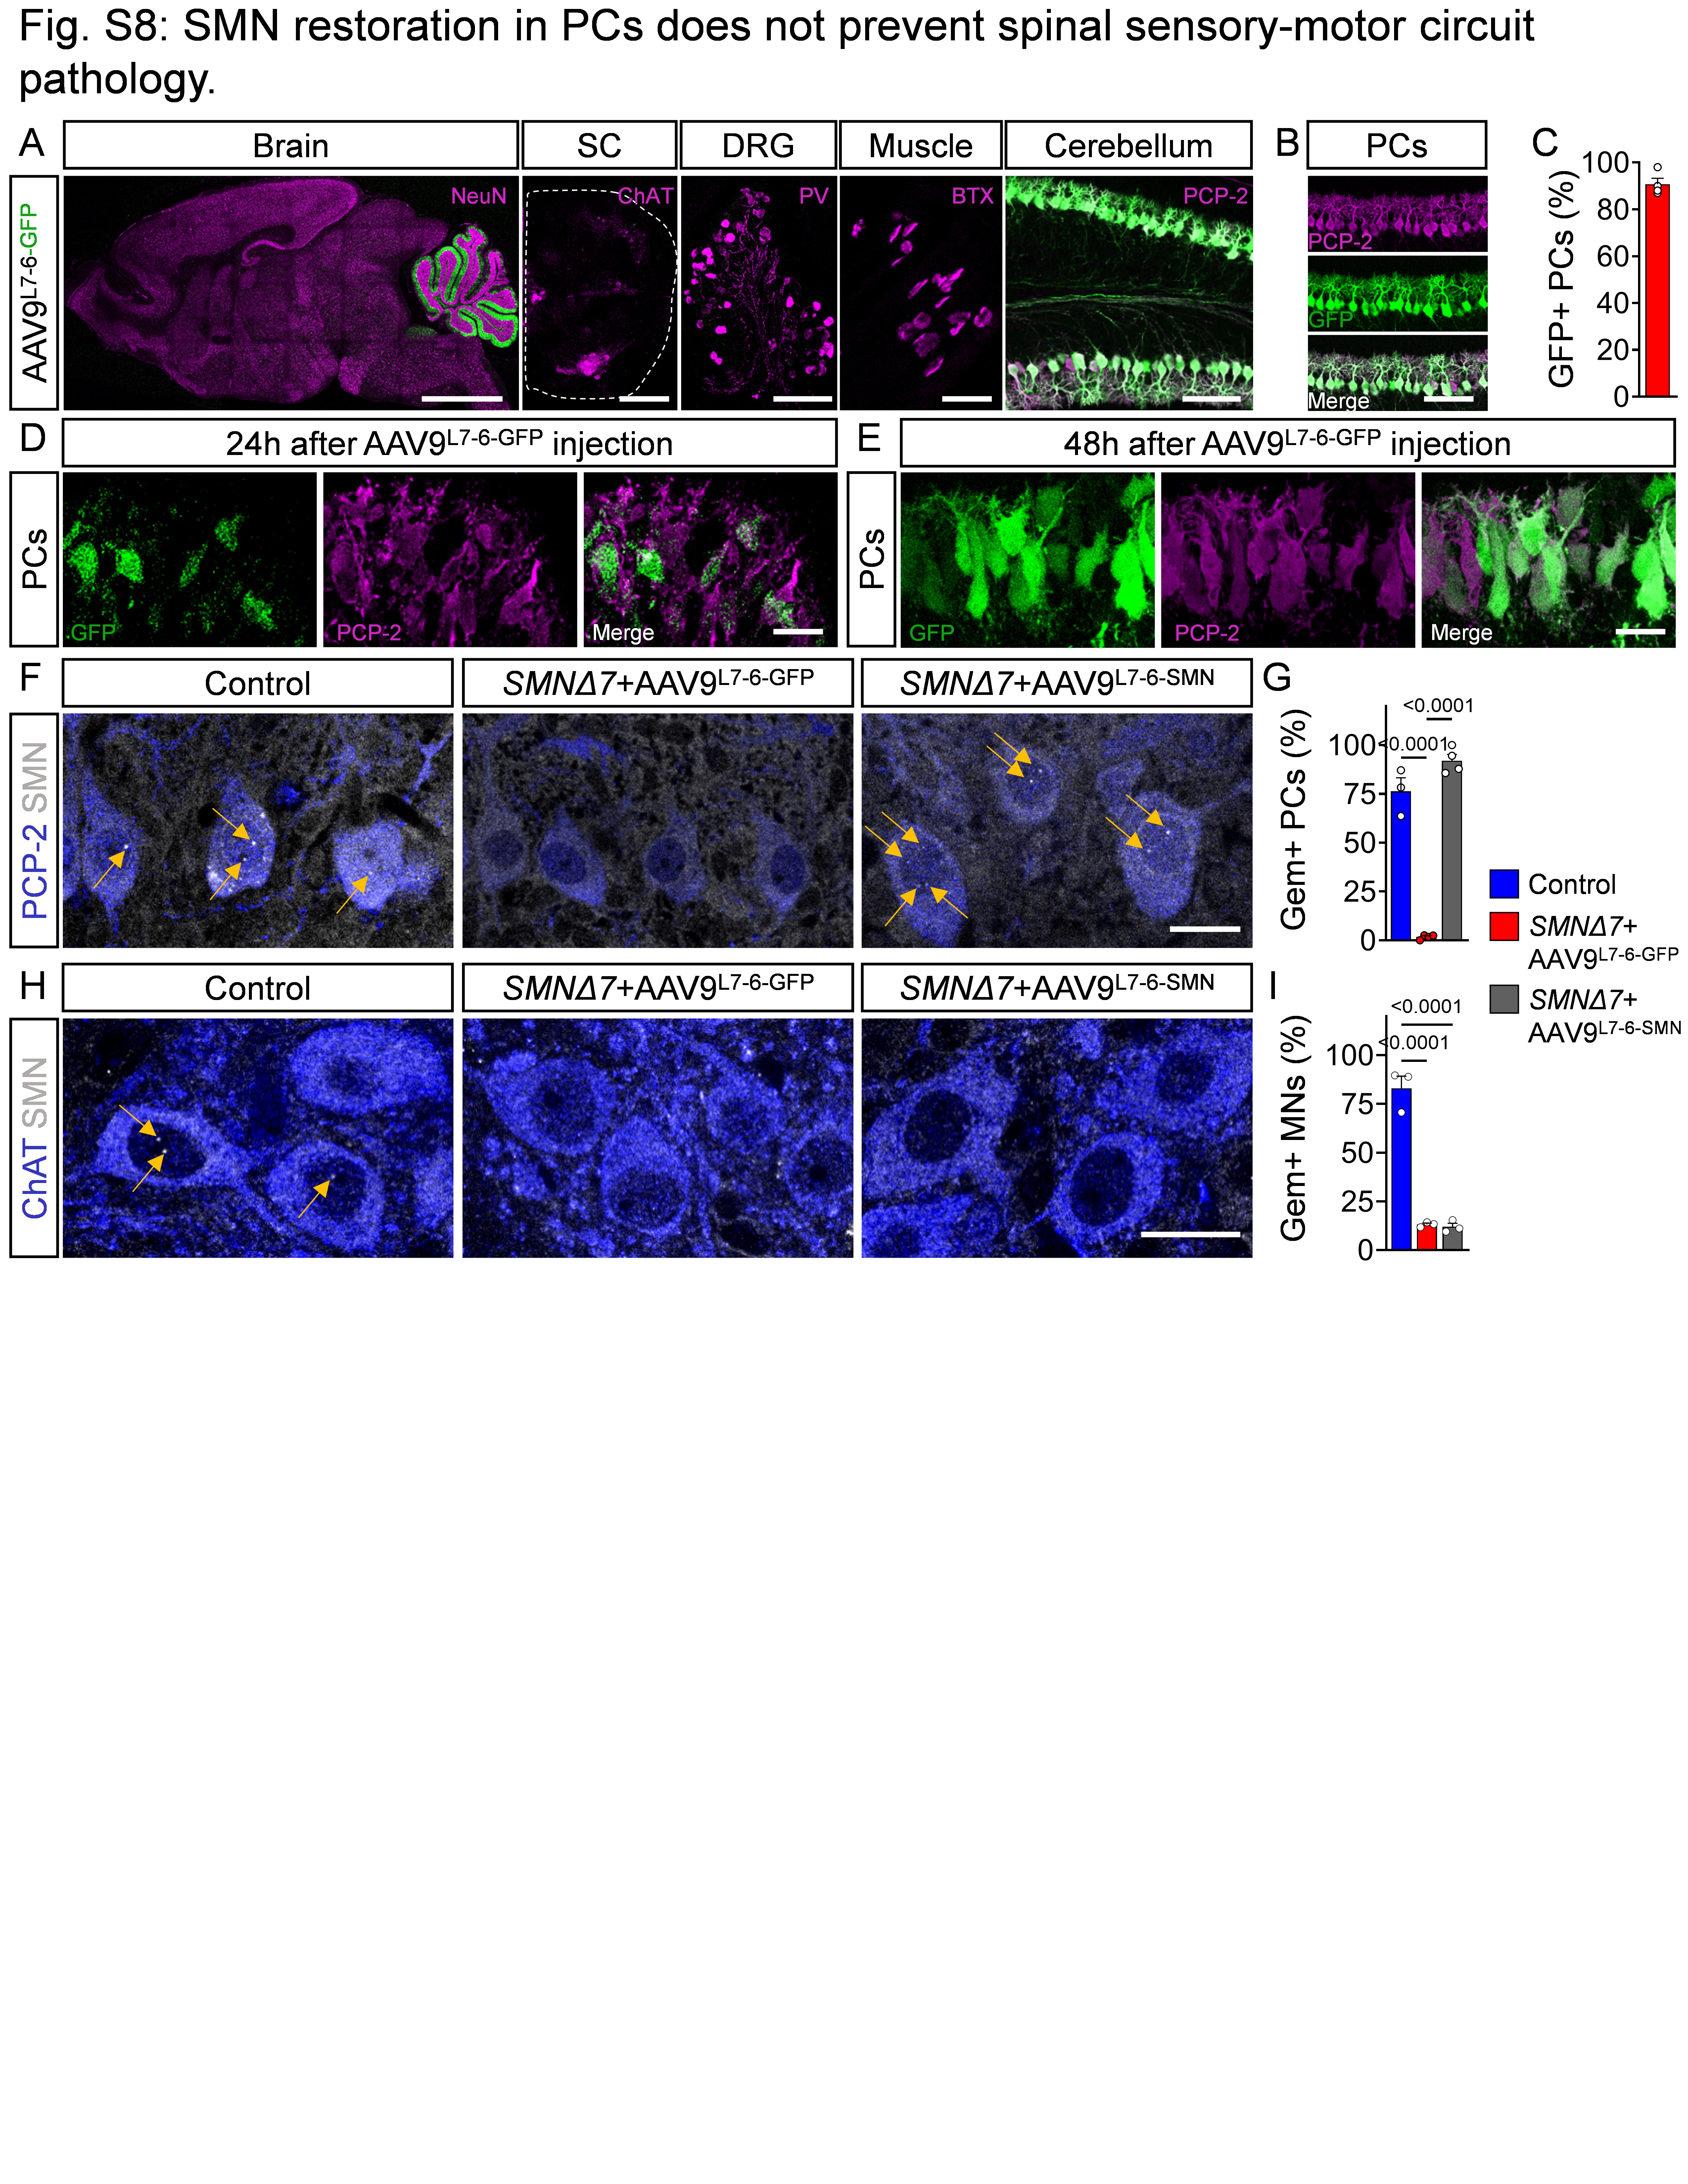


**(A**) Immunostaining of GFP (green) in combination with either NeuN (magenta) in the brain, ChAT (magenta) in the spinal cord (SC), parvalbumin (magenta) in the dorsal root ganglion (DRG), α-bungarotoxin (BTX) (magenta) in the muscle and PCP-2 (magenta) in the cerebellum from SMNΔ7+AAV9-L7-6-GFP mice at P10 (scale bar: brain = 2 mm, SC/DRG = 200 µm, muscle = 50 µm, cerebellum = 100 µm). (**B**) Immunostaining of PCP-2 (magenta) and GFP (green) in PCs from SMNΔ7+AAV9-L7-6-GFP mice at P10 (scale bar = 100 μm). (**C**) Percentage of GFP+ PCs in lobules VI/VII. Immunostaining of GFP (green) and PCP-2 (magenta) in the cerebellum (**D**) 24 h and (**E**) 48 h after AAV9-L7-6-GFP injection of P1 and P2 mice, respectively (scale bar = 20 µm). (**F**) Immunostaining of PCP-2 (blue) and SMN (grey) in cerebellar lobules VI/VII from control, SMNΔ7+AAV9-L7-6-GFP and SMNΔ7+AAV9-L7-6-SMN mice at P10 (scale bar = 20 µm). (**G**) Quantification of Gem+ PCs from control (N = 3), SMNΔ7+AAV-9L7-6-GFP (N = 4) and SMNΔ7+AAV9-L7-6-SMN (N = 4) mice at P10. (**H**) Immunostaining of ChAT (blue) and SMN (grey) in L1 spinal cords from control, SMNΔ7+AAV9-L7-6-GFP and SMNΔ7+AAV9-L7-6-SMN mice at P10 (scale bar = 20 µm). (**I**) Quantification of motor neurons (MNs) from control (N = 3), SMNΔ7+AAV9-L7-6-GFP (N = 3) and SMNΔ7+AAV9-L7-6-SMN (N = 3) mice at P10. Statistical analysis was performed using one-way ANOVA.

**Figure S9: SMN restoration in PC does not improve sensory-motor circuit, parallel fiber boutons and subset of USV properties in SMA mice.**


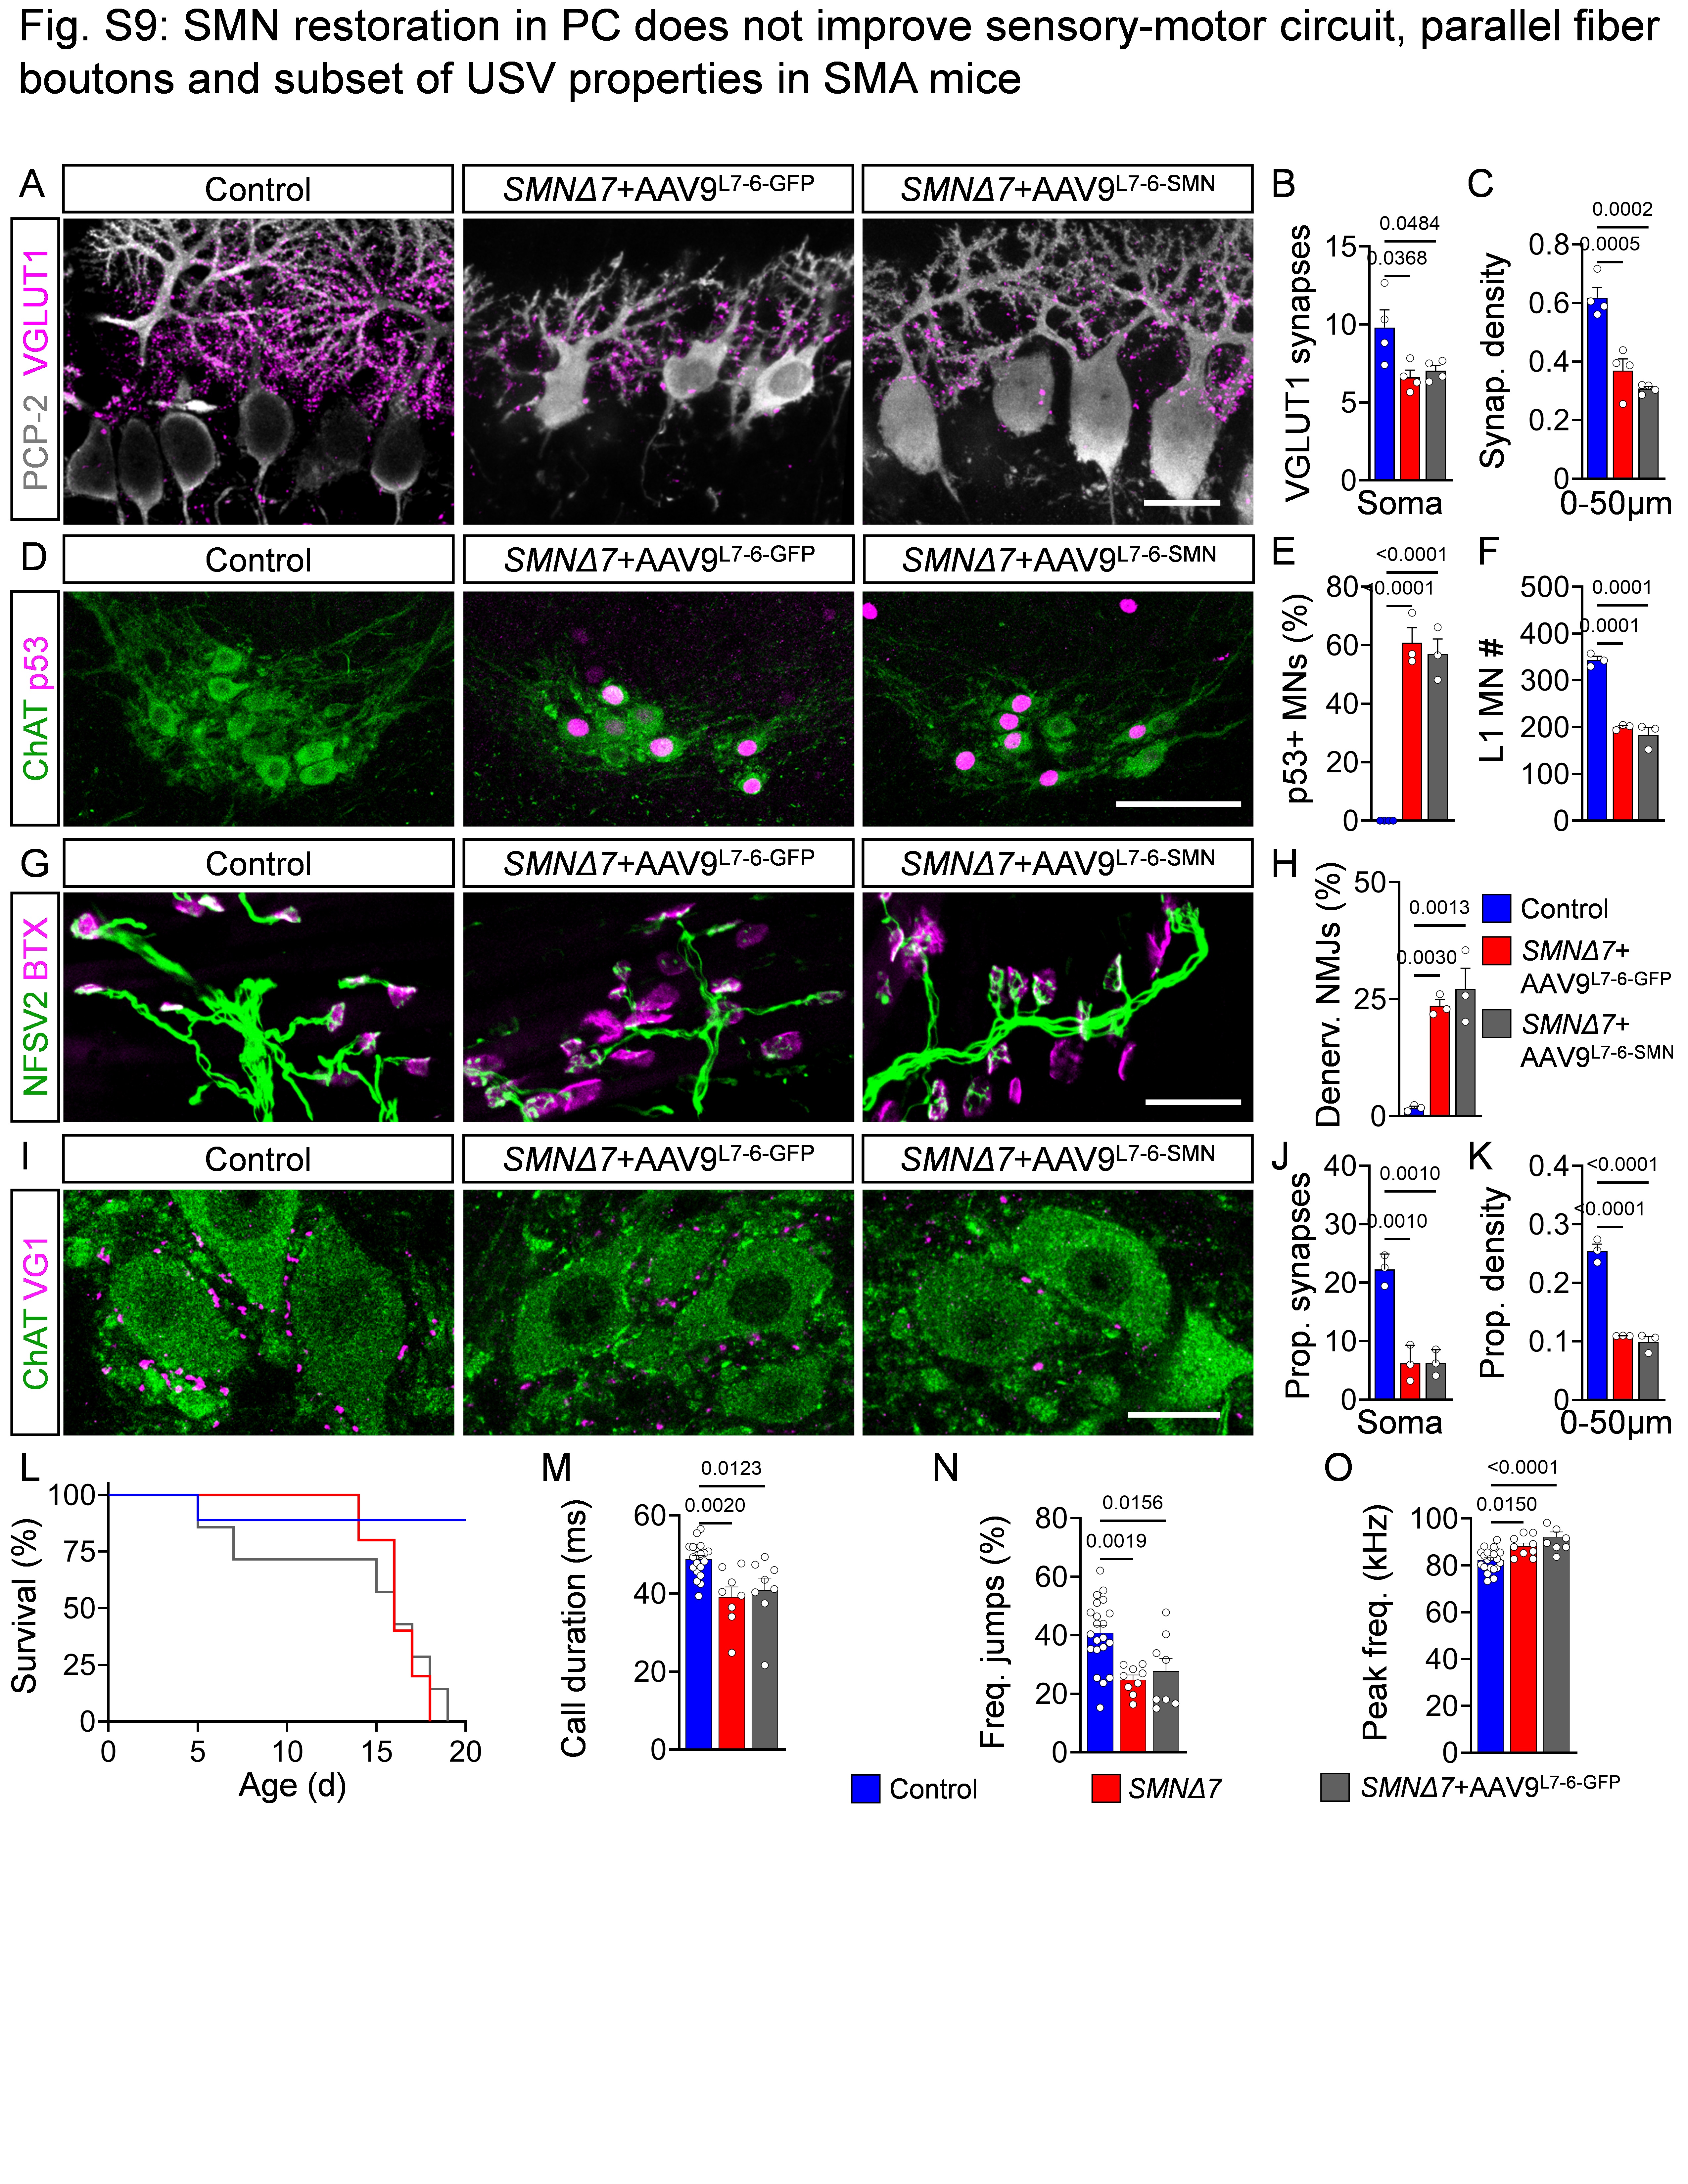


(**A**) Immunostaining of PCP-2 (grey) and VGLUT1 (magenta) in control, *SMNΔ7*+AAV9-L7-6-GFP and *SMNΔ7*+AAV9-L7-6-SMN mice (scale bar = 20 μm). Quantification of (**B**) VGLUT1 synapses and (**C**) dendritic synaptic density (0–50 μm from the soma) in lobules VI/VII from control (N = 6), *SMNΔ7*+AAV9-L7-6-GFP (N = 5) and *SMNΔ7*+AAV9-L7-6-SMN (N = 5) mice. (**D**) Immunostaining of ChAT (green) and p53 (magenta) in ventral L1 spinal cord sections from control, *SMNΔ7*+AAV9-L7-6-GFP and *SMNΔ7*+AAV9-L7-6-SMN mice at P10 (scale bar = 100 μm). Quantification of (**E**) p53⁺ MNs in % and (**F**) the number of L1 MNs from control (N = 3), *SMNΔ7*+AAV9-L7-6-GFP (N = 3) and *SMNΔ7*+AAV9-L7-6-SMN (N = 3) mice at P10. (**G**) Immunostaining of neurofilament (NF), synaptic vesicle 2 (SV2) (green) and BTX (magenta) in the *quadratus lumborum* muscle from control, *SMNΔ7*+AAV9-L7-6-GFP and *SMNΔ7*+AAV9-L7-6-SMN mice at P10 (scale bar = 50 μm). (**H**) Percentage of denervated NMJs in control (N = 3), *SMNΔ7*+AAV9-L7-6-GFP (N = 3) and *SMNΔ7*+AAV9-L7-6-SMN (N = 3) mice at P10. (**I**) Immunostaining of ChAT (green) and VGLUT1 (magenta) in the L1 ventral spinal cord from control, *SMNΔ7*+AAV9-L7-6-GFP and *SMNΔ7*+AAV9-L7-6-SMN mice (scale bar = 20 μm). Quantification of proprioceptive VGLUT1+ synapses onto the (**J**) soma and (**K**) dendritic synaptic density (0–50 μm away from the soma) in control (N = 3), *SMNΔ7*+AAV9-L7-6-GFP (N = 3) and *SMNΔ7*+AAV9-L7-6-SMN (N = 3) mice at P10. (**L**) Survival of control (N = 7), *SMNΔ7*+AAV9-L7-6-GFP (N = 5) and *SMNΔ7*+AAV9-L7-6-SMN (N = 7) mice until P20. Quantification of (**M**) call duration, (**N**) frequency jumps, and (**O**) peak frequency at maximum amplitude in control (N = 22), *SMNΔ7* (N = 8) and *SMNΔ7*+AAV9-L7-6-SMN (N = 8) mice at P5. Note that the data for control and untreated SMA mice are the same as presented in Fig. 4, the AAV9-L7-6-SMN–treated SMA mutants were littermates of the other two groups, and all experiments were conducted at the same time. Statistical analysis was performed using one-way ANOVA (B, C, E, F, H, J, K, M–O) and Log-rank (Mantel–Cox) test (L).

**Supplementary Tables**

**Supplementary Table 1: List of patients.**

| Patient ID | Group | Cause of Death | Sex | Age (m) | PMI (h) | Origin |
| --- | --- | --- | --- | --- | --- | --- |
| 5954 | Control | SUDI | male | 5 | 13 | NIH |
| 5817 | Control | Aspyxia | male | 7.1 | 24 | NIH |
| 5886 | Control | SUDI | male | 1.5 | 27 | NIH |
| 5977 | Control | Smoke inhalation | female | 80.2 | 22 | NIH |
| 6172 | Control | SUDI | male | 3.5 | 34 | NIH |
| 717 | Control | SUDI | female | 2.8 | 24 | NIH |
| 1061 | Control | SUDI | male | 2.1 | 17 | NIH |
| 1132 | Control | SUDI | male | 2.2 | 9 | NIH |
| 1283 | Control | SUDI | female | 2.9 | 23 | NIH |
| 4445 | Control | Aspyxia | male | 3 | 16 | NIH |
| 5637 | Control | SUDI | male | 1.3 | 29 | NIH |
| 8006 | Control | cardiomyopathy | male | 3.1 | 12 | NIH |
| 8008 | Control | Viral infection | female | 4.8 | 25 | NIH |
| 8011 | Control | Asphyxia | male | 5 | 41 | NIH |
| 8012 | Control | SUDI | male | 0.8 | 28 | NIH |
| 1897 | SMA Type I | SMA complications | male | 10.7 | 3 | NIH |
| 4994 | SMA Type I | SMA complications | female | 2 | 19 | NIH |
| 4589 | SMA Type I | Respiratory failure | male | 5.2 | 6 | NIH |
| 4629 | SMA Type I | Cardiopulmonary arrest | male | 5.6 | 3 | NIH |
| 19_01 | SMA Type I | SMA complications | female | 11 | 19 | JHU |
| 14_05 | SMA Type I | Respiratory arrest | male | 8 | 6 | JHU |
| 24_01 | SMA Type I | Refractory hypoxemia | male | 7 | 2 | JHU |

SUDI = sudden unexpected death in infancy, NIH = National Institute of Health, JHU = Johns Hopkins University

**Supplementary Table 2: List of antibodies**

| **Name** | **Company** | **Cat #** | **Host** | **Reactivity** | **Dilution** |
| --- | --- | --- | --- | --- | --- |
| PCP-2 | Santa Cruz | Sc-137064 | Mouse | Mouse/Human | 1:400 |
| Parvalbumin | Synaptic Systems | 195 006 | Chicken | Mouse | 1:5,000 |
| Calbindin | Synaptic Systems | 214006 | Chicken | Mouse | 1:500 |
| p53 | Leica Novocastra | NCL-p53-CM5p | Rabbit | Mouse | 1:1,000 |
| p-p53S15/18 | Cell Signaling | 9284 (Lots: 12,15) | Rabbit | Mouse | 1:500 |
| p-p53S15 | Cell Signaling | E9Y4U | Rabbit | Human | 1:500 |
| VGLUT1 | Synaptic Systems | 135 304 | Guinea pig | Mouse | 1:5,000 |
| VGLUT2 | Synaptic Systems | 135 403 | Rabbit | Mouse | 1:1000 |
| VGAT | Synaptic Systems | 131 004 | Guinea pig | Mouse | 1:500 |
| SMN | BD Transd. Labs | 610646 | Mouse | Mouse | 1:100 |
| SV2 | DSHB | SV2-c | Mouse | Mouse | 1:500 |
| Neurofilament | DSHB | 2H3-c | Mouse | Mouse | 1:1000 |
| Bungarotoxin | Invitrogen | B35451 | N/A | Mouse | 1:1000 |
| ChAT | Millipore | AB144P | Goat | Mouse | 1:500 |
